# Supplementary material for: Dynamic modulation of decision biases by brainstem arousal systems
Source: eLife journal article supplement (doi:10.7554/elife.23232), 2017-04-06
Supplement: supp [file elife-23232-supp-v1.zip]

Archive with 16 entries (16 files):
- elife_poa_e23232_Figure_3_source_data_3.txt
- elife_poa_e23232_Figure_2_figure_supplement_1.pdf
- elife_poa_e23232_Figure_8_figure_supplement_1.pdf
- elife_poa_e23232_Figure_1_figure_supplement_1.pdf
- elife_poa_e23232_Figure_3_source_data_1.csv
- elife_poa_e23232_Figure_9_figure_supplement_1.pdf
- elife_poa_e23232_Figure_4_figure_supplement_2.pdf
- elife_poa_e23232_Figure_7_figure_supplement_1.pdf
- elife_poa_e23232_Figure_2_source_data_2.csv
- elife_poa_e23232_Figure_4_figure_supplement_1.pdf
- elife_poa_e23232_Figure_5_figure_supplement_1.pdf
- elife_poa_e23232_Figure_2_source_data_3.txt
- elife_poa_e23232_Figure_3_source_data_2.csv
- elife_poa_e23232_Figure_4_source_data_2.txt
- elife_poa_e23232_Figure_4_source_data_1.csv
- elife_poa_e23232_Figure_2_source_data_1.csv
