# Supplementary material for: Dynamic modulation of decision biases by brainstem arousal systems
Source: eLife journal article supplement (doi:10.7554/elife.23232), 2017-04-06
Supplement: supp [file elife-23232-supp-v1.zip › elife_poa_e23232_Figure_2_source_data_1.csv]

	d'	crit	yes_frac	TPR
0	0.797325731604	0.342931178059	0.375702247191	0
1	1.62089498401	0.163470846722	0.4539	0
2	1.08675803133	0.264695618247	0.409756097561	0
3	1.80781103968	-0.0407640715522	0.510702586207	0
4	0.937003671785	0.062758921471	0.477465753425	0
5	1.00544372053	0.21880042372	0.423774390244	0
6	1.30021032779	0.377049109022	0.379065789474	0
7	0.697061816674	-0.0471943874775	0.517793333333	0
8	1.61999196553	-0.0231508833123	0.506689873418	0
9	1.0516101645	0.188162015948	0.435120689655	0
10	1.62937907527	0.0417538445068	0.487901098901	0
11	1.4006616838	0.605855013632	0.316412087912	0
12	2.33363077262	0.492325636114	0.399320895522	0
13	1.66114780069	1.28727301967	0.170478873239	0
0	1.0745266444	0.00989544227748	0.496646067416	1
1	1.35935239463	0.050771979683	0.483676470588	1
2	1.87961276357	0.0840939511938	0.478768292683	1
3	1.24046537681	-0.135828679037	0.544788793103	1
4	0.766939213729	-0.0147393142693	0.505335616438	1
5	1.12873809409	0.0536157414212	0.482103658537	1
6	1.31820565462	0.0573946728694	0.481309210526	1
7	1.19639264351	-0.292050565516	0.596693333333	1
8	1.37671148052	-0.100995849038	0.531784810127	1
9	0.805789687783	-0.149547740755	0.554804597701	1
10	1.68080990521	0.0909918356188	0.474373626374	1
11	1.6064778338	0.484599552935	0.362	1
12	1.65191592686	0.151468213235	0.456858208955	1
13	1.74603553624	0.8958072704	0.265457746479	1
