# Supplementary material for: Dynamic modulation of decision biases by brainstem arousal systems
Source: eLife journal article supplement (doi:10.7554/elife.23232), 2017-04-06
Supplement: supp [file elife-23232-supp-v1.zip › elife_poa_e23232_Figure_2_source_data_2.csv]

	d'	crit	yes_frac	TPR
0	1.39962996646	-0.122652631858	0.538346260388	0
1	1.37105455578	0.563939895142	0.326959359606	0
2	1.25209620137	0.0124773801221	0.495726824458	0
3	1.09215410735	0.19788976116	0.432182033097	0
4	1.2776130178	-0.208079209603	0.567765765766	0
5	1.56429729074	0.652944683895	0.313838095238	0
6	1.1511042386	0.727395653581	0.267696428571	0
7	1.52796538939	-0.124835642098	0.537082733813	0
8	1.63905895642	0.474982247215	0.36648245614	0
9	0.970989181447	0.622841868139	0.289369747899	0
10	0.805108827146	0.43906682	0.342597087379	0
11	2.20708764221	0.819920455719	0.319415	0
12	1.98025035868	0.0873903876982	0.478847457627	0
13	0.630909702214	-0.193867468356	0.573264044944	0
14	1.63531490342	0.149764114393	0.45728125	0
15	1.3223653789	0.66118268945	0.296645348837	0
16	0.821954421536	0.0981158110079	0.464342105263	0
17	1.08982699907	-0.122505544919	0.542382352941	0
18	1.61743540046	-0.356570289465	0.601943089431	0
19	1.25201378993	0.345672257988	0.388042763158	0
20	1.28612307932	0.75961175033	0.267339506173	0
0	1.31981617669	-0.100930895151	0.53221468144	1
1	1.11433053831	0.46771704782	0.344124384236	1
2	1.19420886958	-0.0261747934945	0.508618343195	1
3	1.01288963345	0.024084943466	0.491609929078	1
4	1.34664086661	0.242593134007	0.423301801802	1
5	1.60817732867	0.627083244299	0.323071428571	1
6	1.4143592446	0.147267776394	0.454107142857	1
7	1.31742727968	-0.157809169404	0.550920863309	1
8	1.75552679244	0.534424182687	0.356530701754	1
9	1.25303501939	0.226407687723	0.426008403361	1
10	1.25131317393	0.282801281574	0.407276699029	1
11	1.56953452445	0.0568539713456	0.48304	1
12	2.01385142823	-0.115836584078	0.527656779661	1
13	0.952421969517	-0.207144846904	0.573769662921	1
14	1.51153258393	0.131380267055	0.460517857143	1
15	0.824308262402	0.192431215382	0.429918604651	1
16	1.01803028214	0.0708827602712	0.475197368421	1
17	1.13113195032	-0.255226113174	0.58625	1
18	1.0462829641	-0.196826490046	0.568016260163	1
19	1.71045517001	0.261406192014	0.427921052632	1
20	1.54601169382	0.515612320808	0.349765432099	1
