# Supplementary material for: Dynamic modulation of decision biases by brainstem arousal systems
Source: eLife journal article supplement (doi:10.7554/elife.23232), 2017-04-06
Supplement: supp [file elife-23232-supp-v1.zip › elife_poa_e23232_Figure_3_source_data_1.csv]

	d'	crit	yes_frac	TPR
0	0.985432517955	0.192161514531	0.432462171053	0
1	1.46695733551	0.0426212883502	0.487074137931	0
2	1.29971154572	-0.124518188233	0.540161666667	0
3	1.56838707743	-0.00505385504118	0.501550488599	0
4	1.87202999239	0.17867281244	0.453932525952	0
5	0.977715200237	0.339607048463	0.381601694915	0
6	1.19633735534	0.194252704323	0.43547972973	0
7	1.3190528519	-0.194265409688	0.562028911565	0
8	1.44694493155	0.265316159584	0.41898880597	0
9	1.32911894439	0.00231178970456	0.499502	0
10	1.27229601545	0.0758128283365	0.475239130435	0
11	1.44451238043	0.368343418548	0.388193262411	0
12	0.988203807137	-0.152278872827	0.553526578073	0
13	1.24188364224	-0.20220685193	0.566286195286	0
14	0.965767372696	0.0607890939507	0.478407216495	0
15	1.42394883116	0.0174314601669	0.494563356164	0
16	1.72673584795	-0.191821756868	0.552663385827	0
17	1.49999991404	0.291877807252	0.412641914191	0
18	1.10296389359	-0.390102904059	0.631269491525	0
19	1.36100751772	0.708358785845	0.285668518519	0
20	0.97420346604	0.792770795868	0.240281362007	0
21	1.73198620084	-0.0699255603615	0.518987084871	0
22	1.95180671289	0.496397703116	0.377357142857	0
23	1.31126408696	0.018857706718	0.493958745875	0
0	1.05703531753	0.148520290113	0.448575657895	1
1	1.57539968199	0.0490550188196	0.485760344828	1
2	1.35040724656	-0.0421010571845	0.513451666667	1
3	1.29217250212	-0.209398291384	0.567482084691	1
4	1.19171011273	0.103341718677	0.46573183391	1
5	1.18440088642	0.396550911164	0.3695	1
6	1.24192987295	0.235226512057	0.423163851351	1
7	1.317719684	-0.256031935283	0.581552721088	1
8	1.31603015097	0.113674160551	0.463279850746	1
9	1.4512772045	-0.235449370533	0.571766	1
10	1.16335778506	0.148020797737	0.450309364548	1
11	1.48679523178	0.315480762438	0.405062056738	1
12	0.738844783758	-0.138802435953	0.551619601329	1
13	1.40479534406	-0.127937678863	0.53968013468	1
14	1.40655857371	-0.0691460657083	0.521687285223	1
15	1.36551219574	-0.243111003438	0.576335616438	1
16	1.69651004372	-0.139427267992	0.538846456693	1
17	1.45036109811	0.0103011121988	0.496722772277	1
18	1.18248429608	-0.478476960116	0.656437288136	1
19	1.71843213499	0.59271725321	0.339038888889	1
20	1.0584908221	0.342631993945	0.382840501792	1
21	1.57722770967	-0.181272141435	0.552784132841	1
22	1.82932890181	0.424702853655	0.389340225564	1
23	1.04635669483	-0.146308899274	0.550740924092	1
