# Supplementary material for: Dynamic modulation of decision biases by brainstem arousal systems
Source: eLife journal article supplement (doi:10.7554/elife.23232), 2017-04-06
Supplement: supp [file elife-23232-supp-v1.zip › elife_poa_e23232_Figure_3_source_data_2.csv]

	d'	crit	non_pref_frac	TPR
0	1.77277229089	0.344991060317	0.407581818182	0
1	1.66835231251	-0.0192146414066	0.505442307692	0
2	1.64926353173	-0.205324996358	0.558326923077	0
3	2.00427478905	-0.205276655698	0.45075	0
4	1.83147236043	-0.485008880918	0.373550847458	0
5	1.86368085463	-0.269786260566	0.43035	0
6	1.96274562277	-0.291963996405	0.428301886792	0
7	1.36202191713	-0.265770797737	0.416672413793	0
8	0.928238672504	0.390328062444	0.362910714286	0
9	2.22104525914	-0.323677530116	0.430147058824	0
10	1.67443848319	0.0801019440242	0.477782051282	0
11	0.970356980305	0.0915800743554	0.4679	0
12	2.00604641234	-0.24473064918	0.440830357143	0
13	1.42229594767	0.457800870698	0.360690909091	0
14	1.43078325566	-0.233143412994	0.428675925926	0
0	1.68243591687	0.246039425101	0.430645454545	1
1	1.66365837754	0.157339438572	0.455653846154	1
2	1.06438802491	0.204121904922	0.42975	1
3	1.47135048902	-0.0611854943153	0.481079545455	1
4	0.890052643576	0.029786160962	0.510940677966	1
5	1.78526136683	0.21814093322	0.558366666667	1
6	1.12795837971	-0.0723066019439	0.475424528302	1
7	1.3638923908	-0.135290626632	0.45724137931	1
8	1.28747110592	0.0777867310247	0.474848214286	1
9	1.45450112523	-0.217419028781	0.43362745098	1
10	1.82467588632	-0.0550836229403	0.514730769231	1
11	1.40288402715	-0.049263027233	0.515342857143	1
12	2.2725252163	-0.215439631781	0.454491071429	1
13	1.64080914208	0.310573037206	0.411818181818	1
14	1.50433505203	0.0242542351331	0.508064814815	1
