# Supplementary material for: Dynamic modulation of decision biases by brainstem arousal systems
Source: eLife journal article supplement (doi:10.7554/elife.23232), 2017-04-06
Supplement: supp [file elife-23232-supp-v1.zip › elife_poa_e23232_Figure_3_source_data_3.txt]

Source files for behavioural results (related to Figure 3A,C)
-------------------------------------------------------------

Figure 3-source data 1 is a csv table containing the data for Figure 3A (auditory data set).
Figure 3-source data 2 is a csv table containing the data for Figure 3C (visual 2AFC data set).

Code          Explanation
----          -----------
d'            Signal detection theoretic d' (sensitivity)
crit          Signal detection theoretic criterion (bias)
crit_abs      Absolute of signal detection theoretic criterion (bias)
yes_frac      Fraction of yes-choices
non_pref_frac Fraction of non-preferred choices
TPR           Trial-related pupil response (0 = low; 1 = high)
