# Supplementary material for: Dynamic modulation of decision biases by brainstem arousal systems
Source: eLife journal article supplement (doi:10.7554/elife.23232), 2017-04-06
Supplement: supp [file elife-23232-supp-v1.zip › elife_poa_e23232_Figure_4_source_data_1.csv]

	dc	TPR	data_set
0	-0.192347097628	1.0	2
1	-0.383803679278	1.0	2
2	-0.348392868077	1.0	2
3	-0.332487989988	1.0	2
4	-0.326335286978	1.0	2
5	-0.69213060675	1.0	2
6	-0.230313326068	1.0	2
7	0.104022798864	1.0	2
8	-0.423292808657	1.0	2
9	-0.350308903478	1.0	2
10	-0.457385995026	1.0	2
11	-0.182313703717	1.0	2
12	-0.115082949888	1.0	2
13	0.0187694844809	1.0	2
14	-0.289386637381	1.0	2
15	-0.195902384192	1.0	2
16	-0.0246021308511	1.0	2
17	0.171284286042	1.0	2
18	0.268617292109	1.0	2
19	-0.216334082538	1.0	2
20	-0.490343146202	1.0	2
21	-0.141893437597	1.0	1
22	-0.317503415032	1.0	1
23	-0.115586697938	1.0	1
24	-0.0274025794871	1.0	1
25	-0.177485165448	1.0	1
26	-0.205169676514	1.0	1
27	-0.069056150727	1.0	1
28	0.135430217292	1.0	1
29	0.034589564096	1.0	1
30	0.0189826745752	1.0	1
31	-0.234692814966	1.0	1
32	-0.514785191082	1.0	1
33	-0.282472686176	1.0	1
34	-0.847205183536	1.0	1
0	-0.179346076797	0.0	2
1	-0.441286337016	0.0	2
2	-0.484662212895	0.0	2
3	-0.646844424571	0.0	2
4	0.146902060542	0.0	2
5	-0.736526357238	0.0	2
6	-0.726459198698	0.0	2
7	-0.0501229045032	0.0	2
8	-0.629918295352	0.0	2
9	-0.765600179944	0.0	2
10	-0.591878503507	0.0	2
11	-0.903623287121	0.0	2
12	-0.365589868957	0.0	2
13	-0.0582730455235	0.0	2
14	-0.269327894404	0.0	2
15	-0.567546674765	0.0	2
16	-0.17118150604	0.0	2
17	0.0679728621923	0.0	2
18	0.38910025624	0.0	2
19	-0.405771421669	0.0	2
20	-0.700419986082	0.0	2
21	-0.534878669547	0.0	1
22	-0.462691084204	0.0	1
23	-0.392785305066	0.0	1
24	-0.238563876904	0.0	1
25	-0.233967857078	0.0	1
26	-0.564455158849	0.0	1
27	-0.560516183692	0.0	1
28	-0.154921886827	0.0	1
29	-0.104782114819	0.0	1
30	-0.386739834439	0.0	1
31	-0.271761400868	0.0	1
32	-0.672614294034	0.0	1
33	-0.60737713708	0.0	1
34	-1.22905006042	0.0	1
