# Supplementary material for: Dynamic modulation of decision biases by brainstem arousal systems
Source: eLife journal article supplement (doi:10.7554/elife.23232), 2017-04-06
Supplement: supp [file elife-23232-supp-v1.zip › elife_poa_e23232_Figure_4_source_data_2.txt]

Source files for behavioural results (related to Figure 4D)
-------------------------------------------------------------

Figure 4-source data 1 is a csv table containing the data for Figure 4D.

Code          Explanation
----          -----------
dc            DDM drift criterion point estimates
TPR           Trial-related pupil response (0 = low; 1 = high)
data_set      (1 = main fMRI data set; 2 = de Gee et al., 2014 data set)
