# Supplementary figures and images for: Dynamic modulation of decision biases by brainstem arousal systems
Source: eLife journal article supplement (doi:10.7554/elife.23232), 2017-04-06

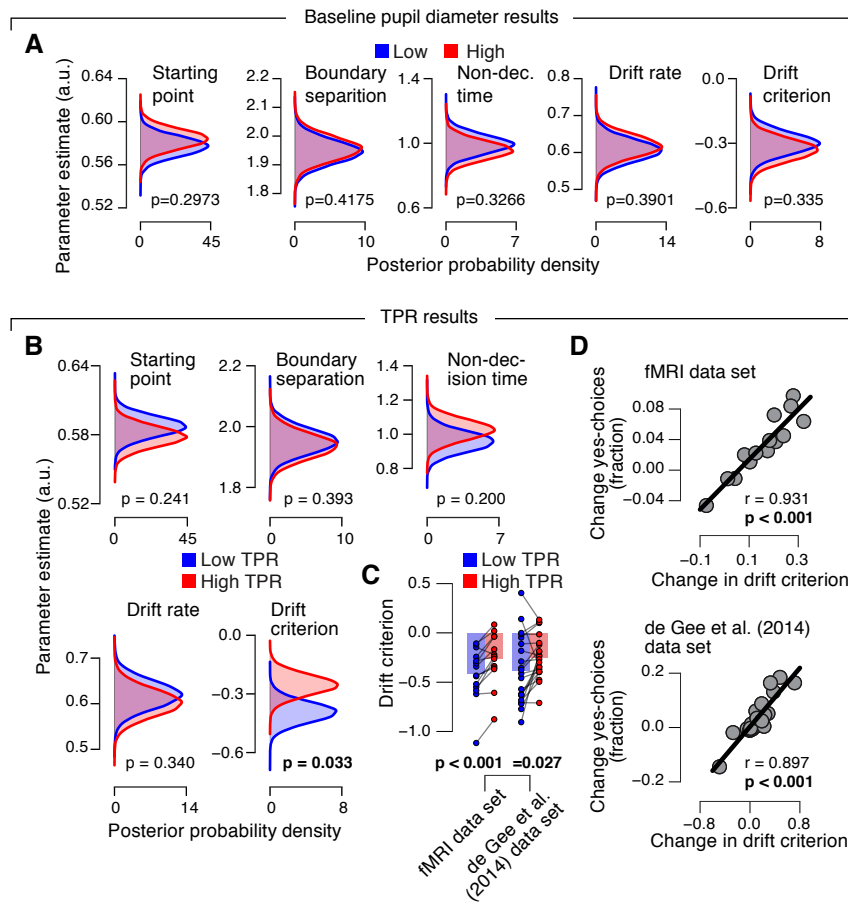

**Figure 4-figure supplement 2**

Supplement: supp [file elife-23232-supp-v1.zip]

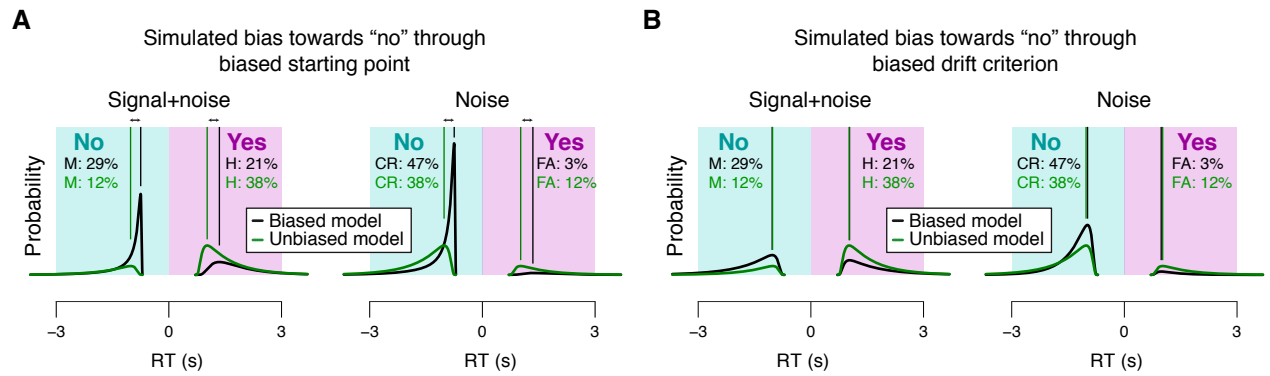

Figure 4-figure supplement 1

Supplement: supp [file elife-23232-supp-v1.zip]

# Baseline pupil diameter results

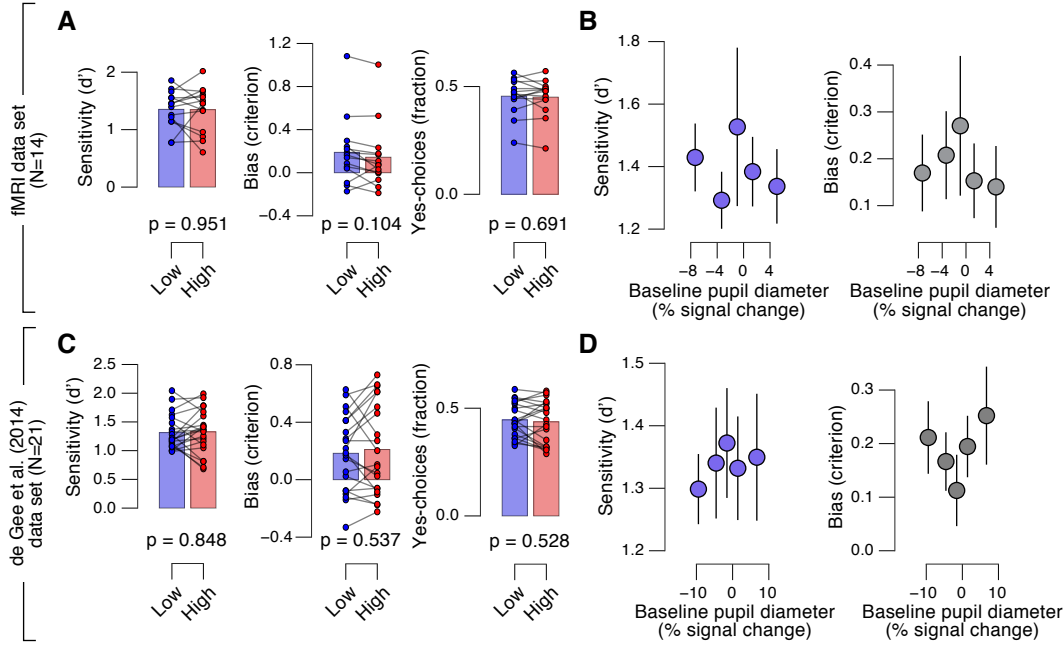

# TPR results

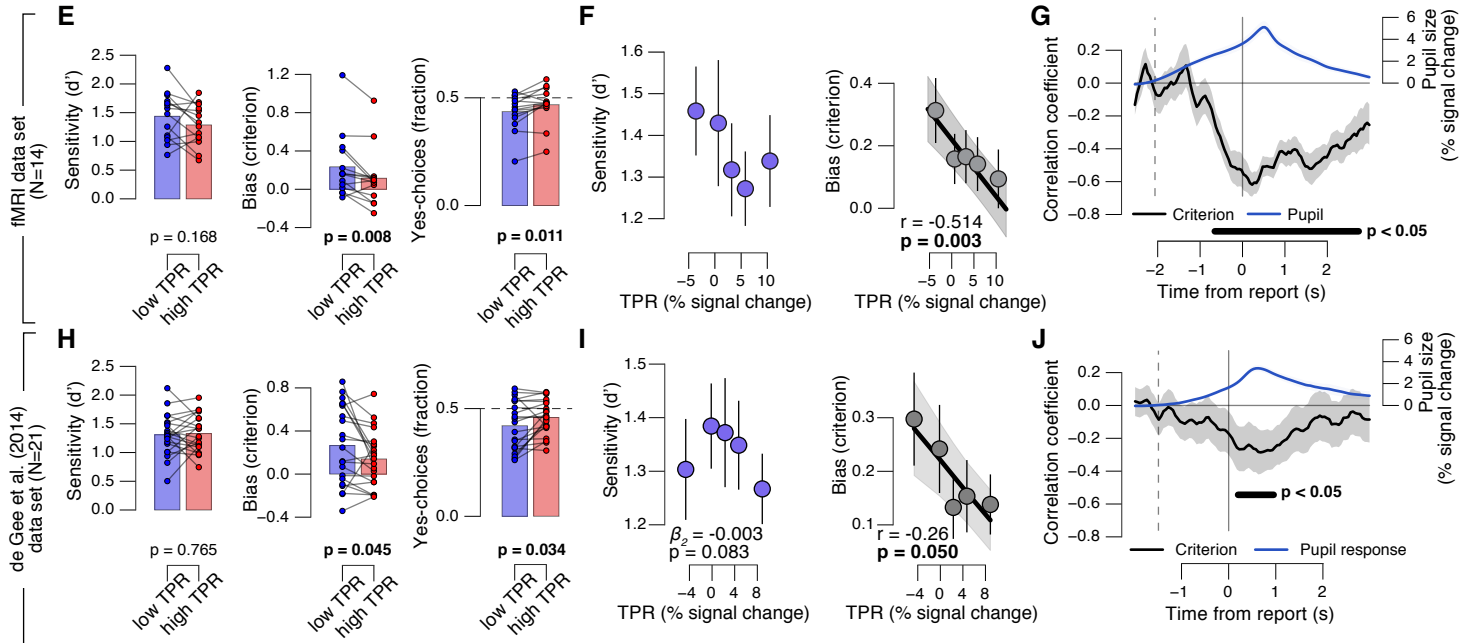

Figure 2-figure supplement 1

Supplement: supp [file elife-23232-supp-v1.zip › elife_poa_e23232_Figure_2_figure_supplement_1.pdf]

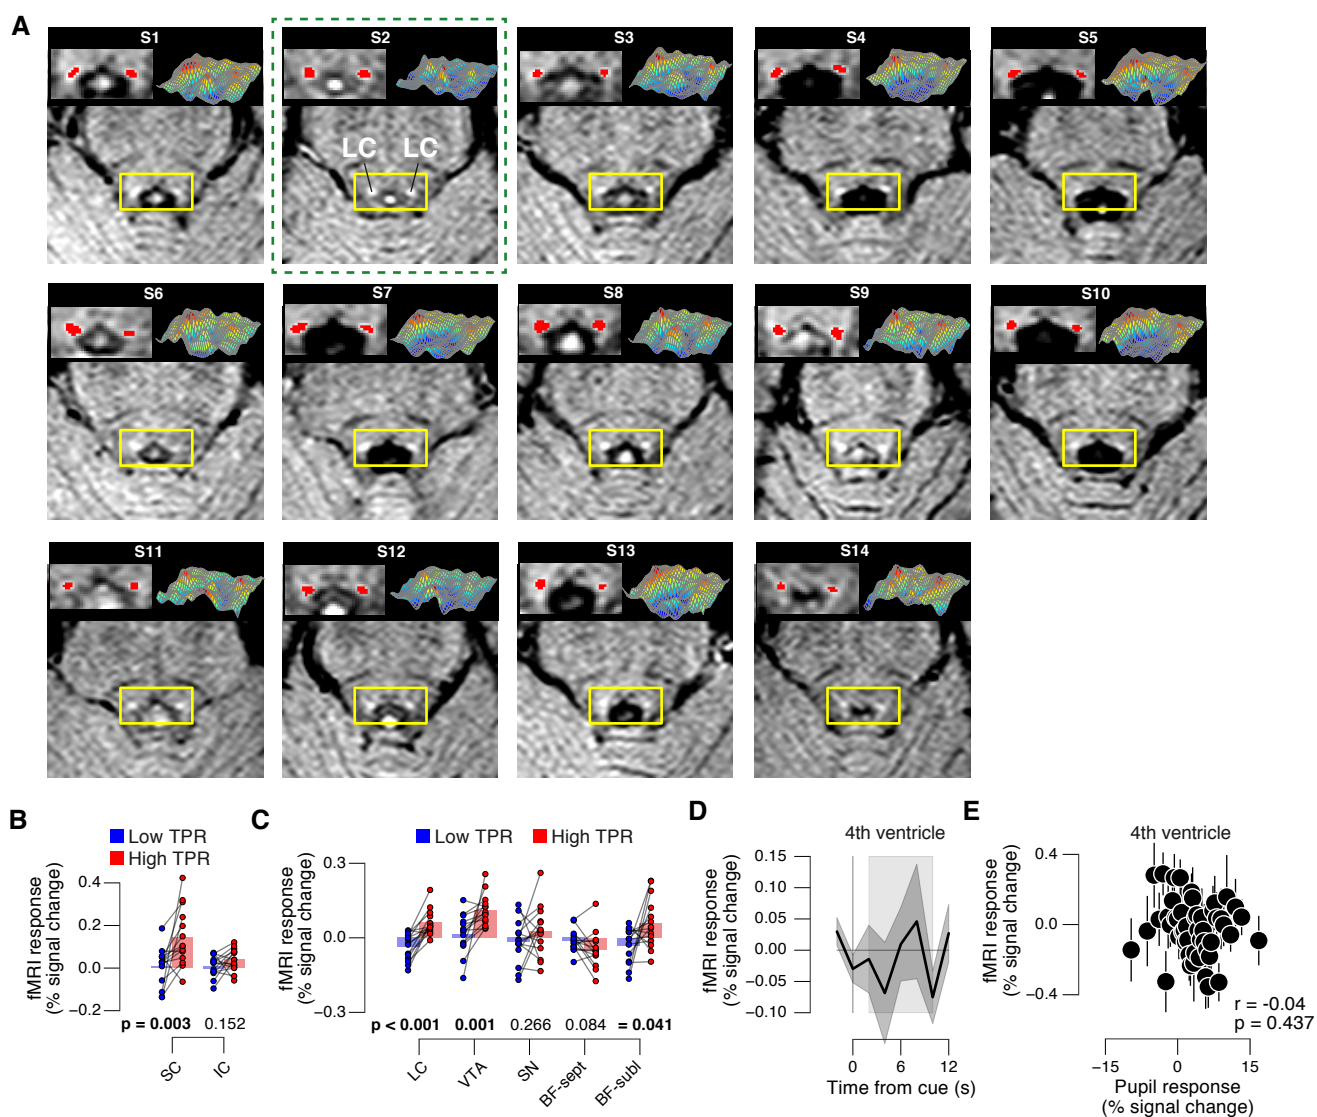

Figure 8-figure supplement 1

Supplement: supp [file elife-23232-supp-v1.zip › elife_poa_e23232_Figure_8_figure_supplement_1.pdf]

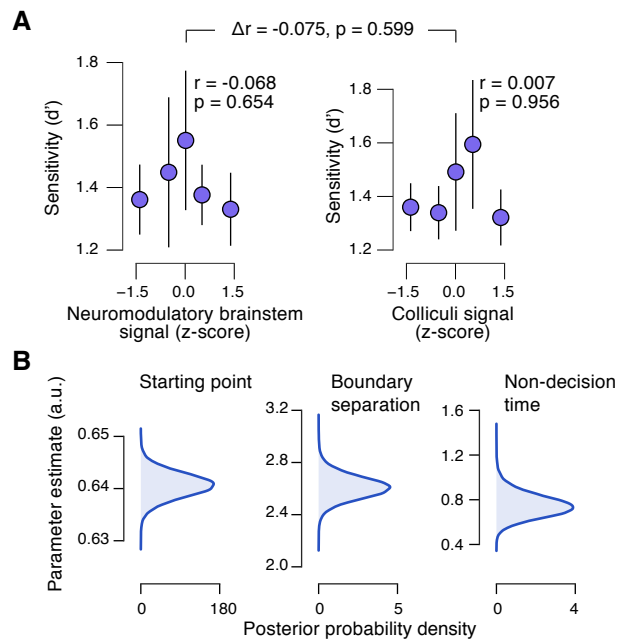

**Figure 9-figure supplement 1**

Supplement: supp [file elife-23232-supp-v1.zip › elife_poa_e23232_Figure_9_figure_supplement_1.pdf]

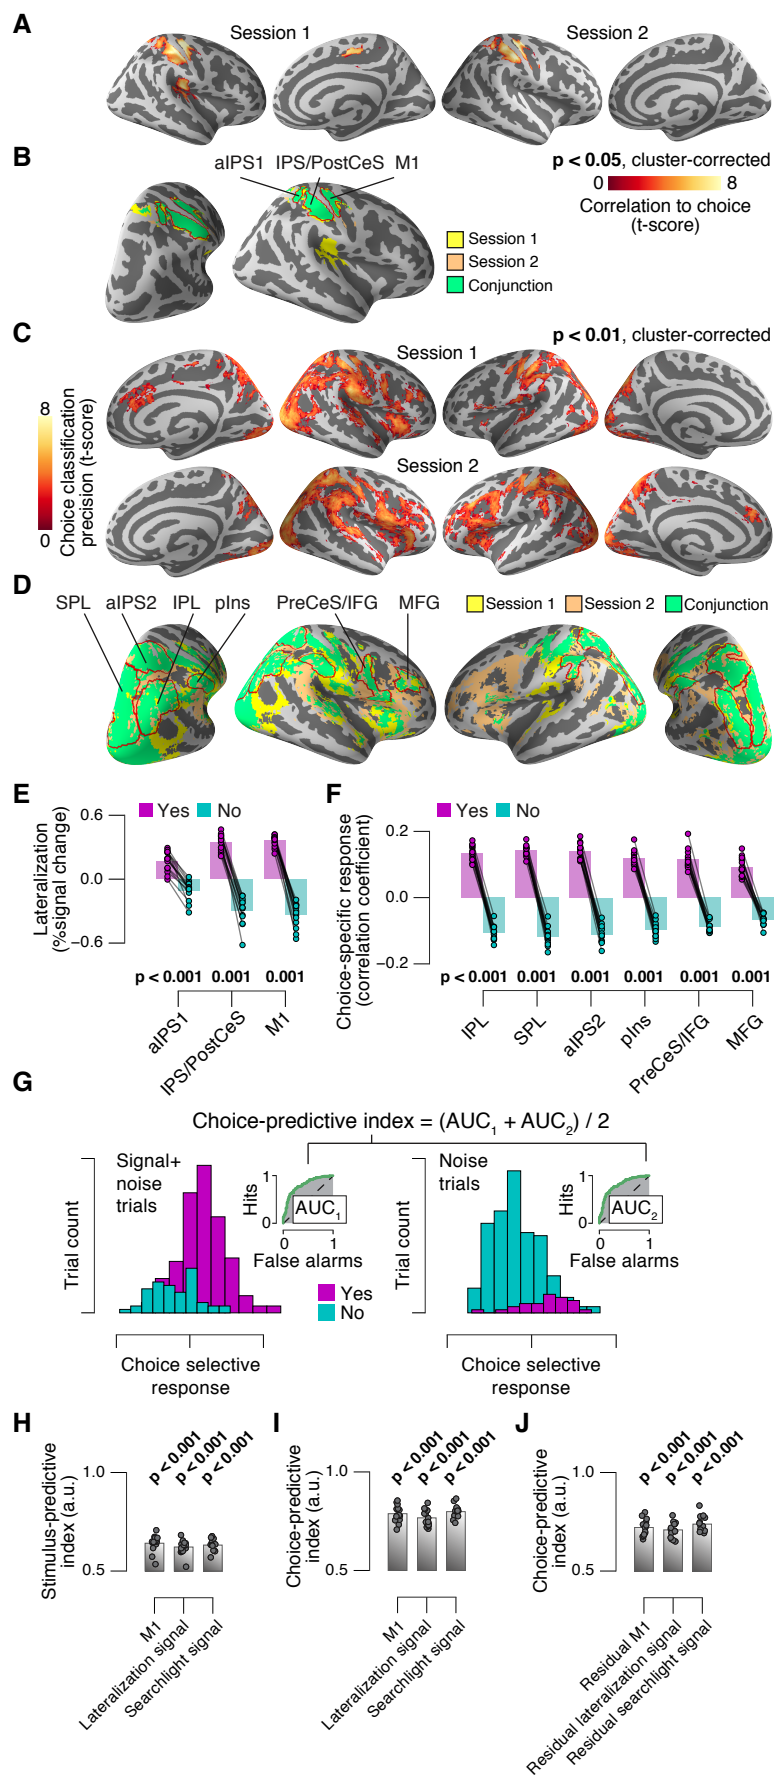

Figure 7-figure supplement 1

Supplement: supp [file elife-23232-supp-v1.zip › elife_poa_e23232_Figure_7_figure_supplement_1.pdf]

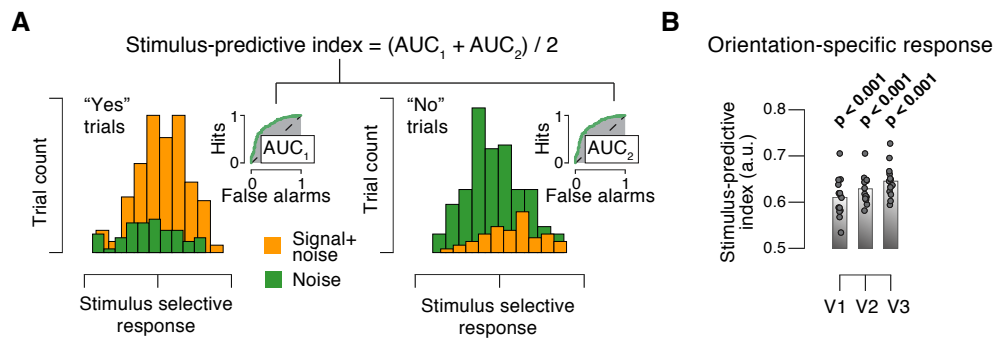

Figure 5-figure supplement 1

Supplement: supp [file elife-23232-supp-v1.zip › elife_poa_e23232_Figure_5_figure_supplement_1.pdf]
